# Supplementary material for: Biomagnification of perfluoroalkyl acids (PFAAs) in the food web of an urban river: assessment of the trophic transfer of targeted and unknown precursors and implications
Source: Royal Society of Chemistry journal article supplement (doi:10.1039/c9em00322c), 2019-01-01
Supplement: c9em00322c1.pdf [file c9em00322c1.pdf]

# **Biomagnification of perfluoroalkyl acids (PFAAs) in the food web of an urban river: assessment of the trophic transfer of targeted and unknown precursors and implications**

Caroline Simonnet-Laprade<sup>1</sup>, H  l  ne Budzinski<sup>2</sup>, Kevin Maciejewski<sup>1</sup>, Karyn Le Menach<sup>2</sup>, Rapha  l Santos<sup>3</sup>, Fabrice Alliot<sup>4</sup>, Aur  lie Goutte<sup>4</sup>, Pierre Labadie<sup>2\*</sup>

<sup>1</sup>Universit   de Bordeaux, EPOC, UMR 5805, F-33400 Talence, France

<sup>2</sup>CNRS, EPOC, UMR 5805, F-33400 Talence, France

<sup>3</sup> HEPIA, University of Applied Sciences Western Switzerland, Ecology and Engineering of Aquatic systems research group, CH-1254 Jussy, Switzerland.

<sup>4</sup> UMR 7619 METIS, EPHE/UPMC/CNRS, PSL Research University, F-75005, Paris, France

\*Corresponding author. Contact: [pierre.labadie@u-bordeaux.fr](mailto:pierre.labadie@u-bordeaux.fr)

## **Electronic Supporting Information**

## **Table of content**

|                                                                                                   |    |
|---------------------------------------------------------------------------------------------------|----|
| SI 1. Sampling .....                                                                              | 4  |
| SI 2. Chemical analysis.....                                                                      | 5  |
| SI 2.1. List of chemicals and reagents.....                                                       | 5  |
| SI 2.2. Analytical method for the determination of PFASs.....                                     | 6  |
| SI 2.3. QA/QC.....                                                                                | 7  |
| SI 3. TOP assay.....                                                                              | 12 |
| SI 3.1. Oxidation tests performed on spiked ultra-pure water samples .....                        | 12 |
| SI 3.2. Oxidation tests performed on fish tissue extracts .....                                   | 13 |
| SI 3.3 Estimation of the contribution of $\sum$ pre-PFAAs <sub>unknown</sub> to $\sum$ PFASs..... | 14 |
| SI 4. Supplementary results.....                                                                  | 15 |

## **Table of illustrations**

### **Figures**

|                                                                                                                                         |    |
|-----------------------------------------------------------------------------------------------------------------------------------------|----|
| Figure S1: Location of the Orge River watershed (left) and location of sampling sites on the Orge River (right):.....                   | 4  |
| Figure S2: PFCA and PFSA concentrations in ultra-pure water before and after oxidation.....                                             | 13 |
| Figure S3: PFAS quantities in tissues of <i>S. cephalus</i> before and after oxidation.....                                             | 14 |
| Figure S4: Mean stable isotope signature ( $\delta^{15}\text{N}$ Vs $\delta^{13}\text{C}$ ) of taxa collected from the Orge River. .... | 18 |
| Figure S5: Linear regression of Log Concentration vs TL for 10:2 FTSA and PFDS, obtained using the Imec function.....                   | 20 |
| Figure S6: $\sum$ pre-PFOS/PFOS and $\sum$ pre-PFCAs/PFCA concentration ratios in the trophic web of the Orge river. ....               | 20 |
| Figure S7: Relation between $\sum$ pre-PFAA <sub>unknown</sub> /PFAA molar concentration ratios and the trophic level (TL).....         | 22 |

### **Tables**

|                                                                                                                                                           |   |
|-----------------------------------------------------------------------------------------------------------------------------------------------------------|---|
| Table S1: Details on fish samples: size/weight of individuals (mean $\pm$ standard deviation and min–max in brackets) and humidity content (min–max)..... | 4 |
| Table S2: Acronyms, names, molecular formulas and associated internal standards of targeted PFASs .....                                                   | 5 |
| Table S3: Mass spectrometry acquisition parameters.....                                                                                                   | 6 |

|                                                                                                                                                                                                      |    |
|------------------------------------------------------------------------------------------------------------------------------------------------------------------------------------------------------|----|
| Table S4: Amounts of PFASs detected in procedural blanks (ng) and TOP assay procedural blanks (ng) (DF = detection frequency).....                                                                   | 8  |
| Table S5: Limits of detection and quantification.....                                                                                                                                                | 9  |
| Table S6: accuracy (%) and recovery (%) of PFASs in mineral water / Fontainebleau sand spiked at 10 ng g <sup>-1</sup> .....                                                                         | 10 |
| Table S7: PFAS concentrations determined in NIST SRM 1947 reference material and in an in-house control matrix (common chub <i>S. Cephalus</i> from the Luynes River, France).....                   | 11 |
| Table S8: Molar conversion rates (%) of selected precursors into PFCAs in ultra-pure water upon oxidation.....                                                                                       | 12 |
| Table S9: Concentration of PFASs detected in sediments (ng g <sup>-1</sup> dry weight) and water (ng L <sup>-1</sup> ) samples. ....                                                                 | 15 |
| Table S10: Concentrations of PFASs detected in fish, expressed in ng g <sup>-1</sup> ww .....                                                                                                        | 16 |
| Table S11: Concentrations of PFASs detected in invertebrates, biofilm, macrophyte and leaf litter (ng g <sup>-1</sup> ww) .....                                                                      | 17 |
| Table S12: Biomagnification factors corrected for trophic level (mean ± standard deviation).....                                                                                                     | 18 |
| Table S13: TMF calculations: details on regressions of Log C (concentrations expressed in ng g <sup>-1</sup> ww, whole body) vs TL obtained with the <i>Imec</i> function of the NADA R-package..... | 19 |
| Table S14: Increase of PFCA concentrations (ΔPCFAs) after oxidation.....                                                                                                                             | 21 |
| Table S15: Conversion factors used to estimate the molar concentration of PFCAs produced by the oxidation of known precursors. ....                                                                  | 21 |

## SI 1. Sampling

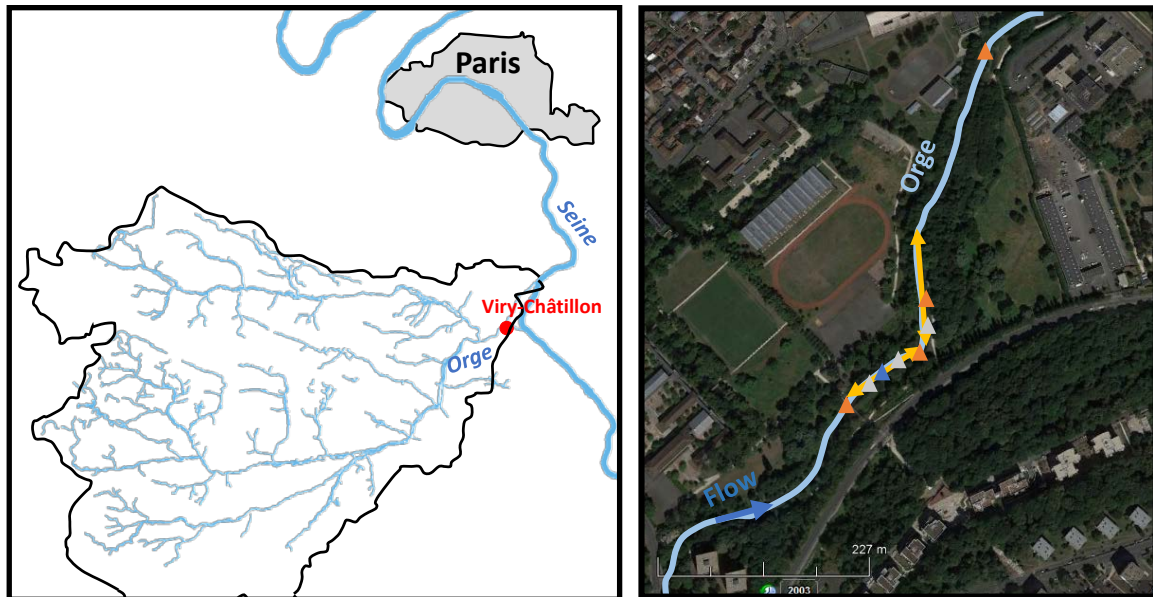

Figure S1: Location of the Orge River watershed (left) and location of sampling sites on the Orge River (right): water (blue triangle), sediments/leaf litter/biofilm/macrophytes (grey triangles), invertebrates (orange triangles) and fish (yellow arrows). The blue arrow indicates the water flow direction.

Table S1: Details on fish samples: size/weight of individuals (mean  $\pm$  standard deviation and min–max in brackets) and humidity content (min–max).

| Fish species          | Number of samples | Number of individuals/sample | Size (cm)              | Weight (g)             | Humidity content (%) |
|-----------------------|-------------------|------------------------------|------------------------|------------------------|----------------------|
| <i>B. barbus</i>      | 1                 | 1                            | 13.6                   | 25                     | 71                   |
| <i>C. gobio</i>       | 4                 | 1–2                          | 9 $\pm$ 2 (6.9–10.8)   | 9 $\pm$ 5 (5.4–10.8)   | 73–78                |
| <i>R. rutilus</i>     | 4                 | 1–2                          | 10 $\pm$ 2 (7.8–12.7)  | 10 $\pm$ 2 (7.0–19.5)  | 73–77                |
| <i>G. gobio</i>       | 4                 | 1–2                          | 11 $\pm$ 1 (10.0–11.8) | 11 $\pm$ 1 (7.5–16.0)  | 77–79                |
| <i>P. fluviatilis</i> | 4                 | 2–3                          | 7 $\pm$ 1 (4.8–8.0)    | 7 $\pm$ 1 (2.0–6.0)    | 77–79                |
| <i>L. gibbosus</i>    | 4                 | 1–3                          | 7 $\pm$ 2 (5.5–10)     | 7 $\pm$ 2 (2.5–18.5)   | 74–75                |
| <i>I. melas</i>       | 4                 | 1                            | 12 $\pm$ 2 (9.2–14.2)  | 12 $\pm$ 2 (10.5–31)   | 78–80                |
| <i>T. tinca</i>       | 4                 | 1                            | 12 $\pm$ 1 (10–12.8)   | 12 $\pm$ 1 (15.4–32.0) | 78–80                |

## SI 2. Chemical analysis

### SI 2.1. List of chemicals and reagents

Table S2: Acronyms, names, molecular formulas and associated internal standards of targeted PFASs

| Acronym   | Compound name                                                                 | Molecular formula                                                                                                 | Associated internal standard                                |
|-----------|-------------------------------------------------------------------------------|-------------------------------------------------------------------------------------------------------------------|-------------------------------------------------------------|
| PFBA      | perfluoro-n-butanoic acid                                                     | C <sub>3</sub> F <sub>7</sub> COOH                                                                                | [1,2,3,4- <sup>13</sup> C <sub>4</sub> ] PFBA               |
| PFPeA     | perfluoro-n-pentanoic acid                                                    | C <sub>4</sub> F <sub>9</sub> COOH                                                                                | [1,2- <sup>13</sup> C <sub>2</sub> ] PFHxA                  |
| PFHxA     | perfluoro-n-hexanoic acid                                                     | C <sub>5</sub> F <sub>11</sub> COOH                                                                               | [1,2- <sup>13</sup> C <sub>2</sub> ] PFHxA                  |
| PFHpA     | perfluoro-n-heptanoic acid                                                    | C <sub>6</sub> F <sub>13</sub> COOH                                                                               | [1,2,3,4- <sup>13</sup> C <sub>4</sub> ] PFHpA              |
| PFOA      | perfluoro-n-octanoic acid                                                     | C <sub>8</sub> F <sub>15</sub> COOH                                                                               | [1,2,3,4- <sup>13</sup> C <sub>4</sub> ] PFOA               |
| PFNA      | perfluoro-n-nonanoic acid                                                     | C <sub>9</sub> F <sub>17</sub> COOH                                                                               | [1,2,3,4- <sup>13</sup> C <sub>4</sub> ] PFOA               |
| PFDA      | perfluoro-n-decanoic acid                                                     | C <sub>10</sub> F <sub>19</sub> COOH                                                                              | [1,2- <sup>13</sup> C <sub>2</sub> ] PFDA                   |
| PFUnDA    | perfluoro-n-undecanoic acid                                                   | C <sub>11</sub> F <sub>21</sub> COOH                                                                              | [1,2- <sup>13</sup> C <sub>2</sub> ] PFUnDA                 |
| PFDoA     | perfluoro-n-dodecanoic acid                                                   | C <sub>12</sub> F <sub>23</sub> COOH                                                                              | [1,2- <sup>13</sup> C <sub>2</sub> ] PFDoDA                 |
| PFTTrDA   | perfluoro-n-tridecanoic acid                                                  | C <sub>13</sub> F <sub>25</sub> COOH                                                                              | [1,2- <sup>13</sup> C <sub>2</sub> ] PFDoDA                 |
| PFTeDA    | perfluoro-n-tetradecanoic acid                                                | C <sub>14</sub> F <sub>27</sub> COOH                                                                              | [1,2- <sup>13</sup> C <sub>2</sub> ] PFTeDA                 |
| PFBS      | perfluoro-1-butanefulfonic acid                                               | C <sub>4</sub> F <sub>9</sub> SO <sub>3</sub> H                                                                   | [1,2,3,4- <sup>13</sup> C <sub>4</sub> ] PFHxS              |
| PFHxS     | perfluoro-1-hexanesulfonic acid                                               | C <sub>6</sub> F <sub>13</sub> SO <sub>3</sub> H                                                                  | [1,2,3,4- <sup>13</sup> C <sub>4</sub> ] PFHxS              |
| PFHpS     | perfluoro-1-heptanesulfonic acid                                              | C <sub>7</sub> F <sub>15</sub> SO <sub>3</sub> H                                                                  | [1,2,3,4- <sup>13</sup> C <sub>4</sub> ] PFOS               |
| PFOS      | n-perfluoro-1-octanesulfonic acid                                             | C <sub>8</sub> F <sub>17</sub> SO <sub>3</sub> H                                                                  | [1,2,3,4- <sup>13</sup> C <sub>4</sub> ] PFOS               |
| PFDS      | perfluoro-1-decanesulfonic acid                                               | C <sub>10</sub> F <sub>21</sub> SO <sub>3</sub> H                                                                 | [1,2,3,4- <sup>13</sup> C <sub>4</sub> ] PFOS               |
| 4:2 FTSA  | 1H,1H,2H,2H-perfluorohexane sulfonate                                         | C <sub>4</sub> F <sub>9</sub> CH <sub>2</sub> CH <sub>2</sub> SO <sub>3</sub> <sup>-</sup>                        | [1,2- <sup>13</sup> C <sub>2</sub> ] 6:2 FTSA               |
| 6:2 FTSA  | 1H,1H,2H,2H-perfluorooctane sulfonate                                         | C <sub>6</sub> F <sub>13</sub> CH <sub>2</sub> CH <sub>2</sub> SO <sub>3</sub> <sup>-</sup>                       | [1,2- <sup>13</sup> C <sub>2</sub> ] 6:2 FTSA               |
| 8:2 FTSA  | 1H,1H,2H,2H-perfluorodecane sulfonate                                         | C <sub>8</sub> F <sub>17</sub> CH <sub>2</sub> CH <sub>2</sub> SO <sub>3</sub> <sup>-</sup>                       | [1,2- <sup>13</sup> C <sub>2</sub> ] 6:2 FTSA               |
| 10:2 FTSA | 1H,1H,2H,2H-perfluorododecane sulfonate                                       | C <sub>10</sub> F <sub>19</sub> CH <sub>2</sub> CH <sub>2</sub> SO <sub>3</sub> <sup>-</sup>                      | [1,2- <sup>13</sup> C <sub>2</sub> ] 6:2 FTSA               |
| FOSA      | Perfluorooctanesulfonamide                                                    | C <sub>8</sub> F <sub>17</sub> SO <sub>2</sub> NH <sub>2</sub>                                                    | [ <sup>13</sup> C <sub>8</sub> ]FOSA                        |
| MeFOSA    | N-methyl perfluorooctanesulfonamide                                           | C <sub>8</sub> F <sub>17</sub> SO <sub>2</sub> N(CH <sub>3</sub> )H                                               | D <sub>3</sub> -MeFOSA                                      |
| EtFOSA    | N-ethyl perfluorooctanesulfonamide                                            | C <sub>8</sub> F <sub>17</sub> SO <sub>2</sub> N(C <sub>2</sub> H <sub>5</sub> )H                                 | D <sub>3</sub> -MeFOSA                                      |
| FOSAA     | perfluorooctanesulfonamido acetic acid                                        | C <sub>8</sub> F <sub>17</sub> SO <sub>2</sub> NCH <sub>2</sub> COOH                                              | D <sub>3</sub> -MeFOSAA                                     |
| MeFOSAA   | 2-(N-methylperfluorooctanesulfonamido) acetic acid                            | C <sub>8</sub> F <sub>17</sub> SO <sub>2</sub> N(CH <sub>3</sub> )CH <sub>2</sub> COOH                            | D <sub>3</sub> -MeFOSAA                                     |
| EtFOSAA   | 2-(N-ethylperfluorooctanesulfonamido) acetic acid                             | C <sub>8</sub> F <sub>17</sub> SO <sub>2</sub> N(C <sub>2</sub> H <sub>5</sub> )CH <sub>2</sub> COOH              | D <sub>3</sub> -MeFOSAA                                     |
| 6:2 diPAP | bis(1H,1H,2H,2H-perfluorooctyl) phosphate                                     | bis[CF <sub>3</sub> (CF <sub>2</sub> ) <sub>5</sub> CH <sub>2</sub> CH <sub>2</sub> ]PO <sub>4</sub> <sup>-</sup> | [1,2- <sup>13</sup> C <sub>2</sub> ] <sub>2</sub> 6:2 diPAP |
| 8:2 diPAP | bis(1H,1H,2H,2H-perfluorodécyl) phosphate                                     | bis[CF <sub>3</sub> (CF <sub>2</sub> ) <sub>7</sub> CH <sub>2</sub> CH <sub>2</sub> ]PO <sub>4</sub> <sup>-</sup> | [1,2- <sup>13</sup> C <sub>2</sub> ] <sub>2</sub> 6:2 diPAP |
| HFPO-DA   | 2,3,3,3-tetrafluoro-2-(1,1,2,2,3,3,3-heptafluoropropoxy)propanoic acid (GenX) | C <sub>6</sub> HF <sub>11</sub> O <sub>3</sub>                                                                    | [1,2- <sup>13</sup> C <sub>2</sub> ] PFHxA                  |
| ADONA     | dodecafluoro-3H-4,8-dioxanonoate                                              | C <sub>6</sub> F <sub>12</sub> O <sub>2</sub> HCOO <sup>-</sup>                                                   | [1,2,3,4- <sup>13</sup> C <sub>2</sub> ] PFOA               |

Methanol (MeOH) and acetonitrile (ACN) were from J.T. Baker (Atlantic Labo, Bruges, France). Strata X-AW cartridges (200 mg/6 mL) were supplied by Phenomenex (Le Pecq, France). Supelclean ENVI-Carb cartridges (250 mg/6 mL), ammonium hydroxide (NH<sub>4</sub>OH) (28.0–30.0 % NH<sub>3</sub> basis), potassium persulfate of analysis quality (≥ 99%) (Scharlau) and ammonium acetate (CH<sub>3</sub>COONH<sub>4</sub>) (Fluka) for HPLC (≥ 99.0 %) were obtained from Sigma-Aldrich (S<sup>t</sup> Quentin Fallavier, France). Sodium hydroxide (ACS ISO, purity ≥ 99.0 %, Scharlau) was purchased from Atlantic Labo (Bruges, France).

Glass fiber filters (Whatman GF/F) were supplied by VWR International (Fontenay Sous Bois, France). Ultrapure water was obtained using a Millipore Elix 10 system fitted with an EDS Pak polisher. Vittel mineral water was used for recovery tests.

## SI 2.2. Analytical method for the determination of PFASs

**Table S3: Mass spectrometry acquisition parameters**

| Acronym   | Collision energy (V) | Fragmentor (V) | Analyte quantification (Q) transition (m/z) | Analyte confirmation (C) transition (m/z) | Retention time (min) |
|-----------|----------------------|----------------|---------------------------------------------|-------------------------------------------|----------------------|
| PFBA      | 4                    | 380            | 213.0 → 168.9                               | -                                         | 1.2                  |
| PFPeA     | 2                    | 380            | 263.0 → 218.9                               | -                                         | 2.7                  |
| PFHxA     | 2                    | 380            | 313.0 → 268.9                               | 313.0 → 118.9                             | 3.8                  |
| PFHpA     | 2                    | 380            | 363.0 → 318.9                               | 363.0 → 168.9                             | 4.7                  |
| PFOA      | 4                    | 380            | 413.0 → 368.9                               | 413.0 → 168.9                             | 5.4                  |
| PFNA      | 4                    | 380            | 463.0 → 418.9                               | 463.0 → 218.9                             | 6                    |
| PFDA      | 4                    | 380            | 513.0 → 468.9                               | 513.0 → 268.9                             | 6.6                  |
| PFUnDA    | 4                    | 380            | 563.0 → 518.9                               | 563.0 → 268.9                             | 7.2                  |
| PFDoDA    | 4                    | 380            | 613.0 → 568.9                               | 613.0 → 168.9                             | 7.8                  |
| PFTTrDA   | 4                    | 380            | 663.0 → 618.9                               | 663.0 → 369.0                             | 8.9                  |
| PFTeDA    | 8                    | 380            | 712.0 → 668.8                               | 712.0 → 419.0                             | 9.0                  |
| PFBS      | 28                   | 380            | 298.9 → 79.9                                | 298.9 → 98.9                              | 3.9                  |
| PFHxS     | 52                   | 380            | 398.9 → 79.9                                | 398.9 → 98.9                              | 5.7                  |
| PFHpS     | 56                   | 380            | 448.9 → 79.9                                | 448.9 → 98.9                              | 6.3                  |
| PFOS      | 60                   | 380            | 498.9 → 79.9                                | 498.9 → 98.9                              | 7                    |
| PFDS      | 76                   | 380            | 598.9 → 79.9                                | 598.9 → 98.9                              | 8.2                  |
| 4:2 FTSA  | 20                   | 380            | 327.0 → 306.9                               | 327.0 → 80.5                              | 3.5                  |
| 6:2 FTSA  | 20                   | 380            | 427.0 → 406.8                               | 427.0 → 79.9                              | 5.1                  |
| 8:2 FTSA  | 28                   | 380            | 527.0 → 506.9                               | 527.0 → 80.9                              | 6.3                  |
| 10:2 FTSA | 36                   | 380            | 627.0 → 606.8                               | 427.0 → 79.9                              | 7.5                  |
| FOSA      | 38                   | 380            | 497.9 → 77.9                                | -                                         | 8.4                  |
| MeFOSA    | 24                   | 380            | 512.0 → 218.9                               | 512.0 → 168.9                             | 10.1                 |
| EtFOSA    | 24                   | 380            | 526.0 → 218.9                               | 526.0 → 168.9                             | 10.2                 |
| FOSAA     | 36                   | 380            | 497.9 → 77.9                                | -                                         | 6.5                  |
| MeFOSAA   | 16                   | 380            | 570.0 → 511.8                               | 570.0 → 418.8                             | 6.7                  |
| EtFOSAA   | 16                   | 380            | 584.0 → 525.8                               | 584.0 → 418.8                             | 7                    |
| 6:2 diPAP | 20                   | 380            | 789.0 → 443.0                               | 789.0 → 96.9                              | 8.2                  |
| 8:2 diPAP | 28                   | 380            | 989.0 → 542.8                               | 989.0 → 96.9                              | 9.9                  |
| HFPO-DA   | 0                    | 380            | 285.0 → 169.0                               | 285.0 → 185.0                             | 4.1                  |
| ADONA     | 10                   | 380            | 377.0 → 251.0                               | 377.0 → 85.0                              | 5.0                  |

The method was adapted from Munoz et al. (2015). PFAS quantification was performed by isotopic dilution with a five-point calibration curve (analyte concentration: 0.5–25  $\mu\text{g mg}^{-1}$ ; constant IS concentration = 10  $\mu\text{g mg}^{-1}$ ).

### SI 2.3. QA/QC

#### **Blanks**

Contamination was minimized as much as possible using non-fluorinated materials: HDPE-bottles for water sampling and conservation, aluminium trays for sediments and biota sampling, glass and polyethylene vials for extraction and analysis. Procedural blanks were introduced in each sample series: ultra-pure water spiked with ISs for water samples, microwave cells filled with the extraction solvent and spiked with ISs for solid matrices, and bottle filled with ultra-pure water for TOP assay experiments. For each analysis series, instrument blanks were analysed and the absence of cross-contamination was verified by regularly injecting MeOH.

#### **Determination of the limits of detection (LODs) and quantification (LOQs)**

For analytes detected in blanks, LODs were set as the standard deviation of blanks corrected by the  $t_{n-1,95}$  student coefficient,  $n$  being the number of blank replicates. Otherwise, LODs were derived from the signal-to-noise ratio (SNR) observed in low-contaminated samples or in spiked blank samples. LOQs were calculated by multiplying the LOD by 10/3. Levels in procedural blanks are indicated in table S4.

#### **Recoveries**

As regards targeted analysis, whole-method accuracy rates were determined using spiked matrices: Vittel mineral water (2  $\text{ng L}^{-1}$ ) and reference sand sample (10  $\text{ng g}^{-1}$  dw) (Table S6). Method trueness was controlled through the analysis of NIST SRM 1947 reference samples (Lake Michigan Fish Tissue).

As regards the TOP assay, the recoveries of a wide range of PFAAs and pre-PFAAs<sub>targeted</sub> were determined using spiked sand samples (10  $\text{ng g}^{-1}$  dw), ISs being added at the end of the analytical procedure to prevent their oxidation. The actual recoveries of individual pre-PFAAs<sub>unknown</sub> could not be estimated since, by definition, the structure of these compounds was undetermined. It was however assumed that recoveries were i) within the range of that reported for targeted analytes (see table S6) and, more importantly, ii) that the extraction efficiencies of pre-PFAAs<sub>unknown</sub> were similar in all the sample types investigated in the present work. Very recent work showed that conditions stronger than the one used in this work may provide higher yields for some cationic and zwitterionic PFAAs (Munoz et al., 2018). Nevertheless, the abovementioned assumptions were very reasonable since Munoz et al. (2017) previously demonstrated that the MeOH + 0.2 %  $\text{NH}_4\text{OH}$  extraction solvent provided similar recoveries for a wide range of targeted pre-PFAAs (including FTSA and zwitterionic

compounds), in both sediment and fish. Thus, although the contribution of unattributed pre-PFAAs unknown might have been somewhat underestimated, the trends reported in the present work were not affected by recovery issues.

**Table S4: Amounts of PFASs detected in procedural blanks (ng) and TOP assay procedural blanks (ng) (DF = detection frequency).**

| Procedure  | Procedural blanks          |               |                  |               | TOP assay procedural blanks |               |                                         |               |
|------------|----------------------------|---------------|------------------|---------------|-----------------------------|---------------|-----------------------------------------|---------------|
|            | Biota/sediments<br>(n = 8) |               | Water<br>(n = 4) |               | Ultra-pure water<br>(n = 8) |               | Oxidized ultra-pure<br>water<br>(n = 8) |               |
| Parameters | DF %                       | Mean ± SD     | DF %             | Mean ± SD     | DF %                        | Mean ± SD     | DF %                                    | Mean ± SD     |
| PFBA       | 100                        | 0.10 ± 0.07   | 100              | 0.13 ± 0.07   | 37.5                        | 0.05 ± 0.07   | 37.5                                    | 0.01 ± 0.02   |
| PFPeA      | 100                        | 0.12 ± 0.08   | 100              | 0.04 ± 0.01   | 50                          | 0.02 ± 0.03   | 75                                      | 0.01 ± 0.01   |
| PFHxA      | 37.5                       | 0.01 ± 0.01   | 50               | 0.003 ± 0.004 | 75                          | 0.01 ± 0.004  | 100                                     | 0.03 ± 0.03   |
| PFHpA      | 37.5                       | 0.001 ± 0.01  | 50               | 0.002 ± 0.002 | 87.5                        | 0.004 ± 0.003 | 100                                     | 0.01 ± 0.01   |
| PFOA       | 62.5                       | 0.05 ± 0.04   | 50               | 0.003 ± 0.003 | 100                         | 0.02 ± 0.01   | 100                                     | 0.02 ± 0.01   |
| PFDA       | 37.5                       | 0.09 ± 0.12   | 50               | 0.01 ± 0.02   | 50                          | 0.01 ± 0.01   | 12.5                                    | 0.001 ± 0.001 |
| PFUnDA     | 62.5                       | 0.03 ± 0.02   | 100              | 0.03 ± 0.01   | 50                          | 0.01 ± 0.01   | 75                                      | 0.005 ± 0.010 |
| PFDoDA     | 37.5                       | 0.01 ± 0.02   | 0                | nd            | 0                           | nd            | 37.5                                    | 0.002 ± 0.004 |
| PFHxS      | 25                         | 0.001 ± 0.001 | 25               | 0.001 ± 0.001 | 62.5                        | 0.001 ± 0.001 | 0                                       | nd            |
| PFOS       | 87.5                       | 0.04 ± 0.04   | 75               | 0.005 ± 0.004 | 100                         | 0.01 ± 0.003  | 100                                     | 0.01 ± 0.02   |
| FOSA       | 87.5                       | 0.001 ± 0.001 | 100              | 0.002 ± 0.001 | 87.5                        | 0.001 ± 0.001 | 87.5                                    | 0.002 ± 0.002 |
| 6:2 diPAP  | 75                         | 0.02 ± 0.01   | 25               | 0.02 ± 0.03   | 75                          | 0.02 ± 0.02   | 75                                      | 0.02 ± 0.02   |
| 8:2 diPAP  | 25                         | 0.00 ± 0.01   | 50               | 0.004 ± 0.006 | 62.5                        | 0.02 ± 0.04   | 75                                      | 0.05 ± 0.05   |



**Table S5: Limits of detection and quantification**

| Matrix    | Water<br>ng L <sup>-1</sup> |      | Sediments<br>ng g <sup>-1</sup> dw |      | Biota<br>ng g <sup>-1</sup> ww |      |
|-----------|-----------------------------|------|------------------------------------|------|--------------------------------|------|
|           | LOD                         | LOQ  | LOD                                | LOQ  | LOD                            | LOQ  |
| PFBA      | 0.15                        | 0.49 | 0.22                               | 0.74 | 0.06                           | 0.21 |
| PFPeA     | 0.15                        | 0.50 | 0.35                               | 1.16 | 0.10                           | 0.32 |
| PFHxA     | 0.10                        | 0.32 | 0.08                               | 0.27 | 0.02                           | 0.06 |
| PFHpA     | 0.05                        | 0.17 | 0.05                               | 0.16 | 0.01                           | 0.05 |
| PFOA      | 0.19                        | 0.62 | 0.08                               | 0.28 | 0.02                           | 0.08 |
| PFNA      | 0.07                        | 0.24 | 0.10                               | 0.32 | 0.05                           | 0.16 |
| PFDA      | 0.16                        | 0.52 | 0.14                               | 0.45 | 0.03                           | 0.09 |
| PFUnDA    | 0.17                        | 0.56 | 0.12                               | 0.39 | 0.01                           | 0.05 |
| PFDoDA    | 0.27                        | 0.90 | 0.09                               | 0.30 | 0.01                           | 0.03 |
| PFTTrDA   | 0.29                        | 0.96 | 0.16                               | 0.54 | 0.03                           | 0.09 |
| PFTeDA    | 0.23                        | 0.77 | 0.06                               | 0.20 | 0.03                           | 0.10 |
| PFBS      | 0.08                        | 0.27 | 0.09                               | 0.29 | 0.02                           | 0.08 |
| PFHxS     | 0.02                        | 0.07 | 0.08                               | 0.27 | 0.05                           | 0.18 |
| PFHpS     | 0.08                        | 0.26 | 0.08                               | 0.28 | 0.02                           | 0.08 |
| L-PFOS    | 0.06                        | 0.19 | 0.08                               | 0.25 | 0.02                           | 0.07 |
| Br-PFOS   | 0.08                        | 0.26 | 0.08                               | 0.25 | 0.02                           | 0.07 |
| PFDS      | 0.01                        | 0.04 | 0.06                               | 0.19 | 0.005                          | 0.02 |
| 4:2 FTSA  | 0.06                        | 0.19 | 0.02                               | 0.05 | 0.005                          | 0.02 |
| 6:2 FTSA  | 0.03                        | 0.09 | 0.01                               | 0.05 | 0.05                           | 0.18 |
| 8:2 FTSA  | 0.003                       | 0.01 | 0.05                               | 0.15 | 0.03                           | 0.08 |
| 10:2 FTSA | 0.11                        | 0.36 | 0.04                               | 0.13 | 0.01                           | 0.04 |
| FOSA      | 0.02                        | 0.08 | 0.08                               | 0.27 | 0.01                           | 0.03 |
| MeFOSA    | NA                          | NA   | 0.03                               | 0.11 | 0.006                          | 0.02 |
| EtFOSA    | NA                          | NA   | 0.02                               | 0.08 | 0.009                          | 0.03 |
| FOSAA     | 0.10                        | 0.32 | 0.03                               | 0.11 | 0.01                           | 0.03 |
| MeFOSAA   | 0.05                        | 0.16 | 0.05                               | 0.15 | 0.01                           | 0.04 |
| EtFOSAA   | 0.18                        | 0.59 | 0.08                               | 0.27 | 0.01                           | 0.04 |
| 6:2 diPAP | 0.34                        | 1.14 | 0.12                               | 0.39 | 0.03                           | 0.11 |
| 8:2 diPAP | 0.09                        | 0.29 | 0.23                               | 0.76 | 0.06                           | 0.21 |
| HFPO-DA   | 0.05                        | 0.17 | 0.15                               | 0.51 | 0.04                           | 0.14 |
| ADONA     | 0.05                        | 0.17 | 0.15                               | 0.51 | 0.21                           | 0.70 |

**Table S6: accuracy (%) and recovery (%) of PFAS analysis in mineral water / Fontainebleau sand spiked at 10 ng g<sup>-1</sup>.** \*: extracts were not oxidized since the aim of the test was to assess analyte recovery for the initial extraction/clean-up steps; ISs were added at the end of the analytical procedure to prevent their oxidation.  
NM: not measured

| Procedure  | Accuracy         |                                               | Recovery                                     |
|------------|------------------|-----------------------------------------------|----------------------------------------------|
|            | Water extraction | Biota/sediment extraction for direct analysis | Biota/sediment extraction for the TOP assay* |
| Replicates | 5                | 5                                             | 3                                            |
| PFBA       | 94 ± 8           | 109 ± 3                                       | 66 ± 9                                       |
| PFPeA      | 105 ± 7          | 117 ± 5                                       | 86 ± 7                                       |
| PFHxA      | 97 ± 9           | 105 ± 1                                       | 76 ± 12                                      |
| PFHpA      | 98 ± 9           | 107 ± 5                                       | 73 ± 4                                       |
| PFOA       | 101 ± 8          | 110 ± 2                                       | 77 ± 10                                      |
| PFNA       | 89 ± 6           | 101 ± 3                                       | 71 ± 7                                       |
| PFDA       | 106 ± 10         | 113 ± 3                                       | 80 ± 9                                       |
| PFUnDA     | 106 ± 9          | 110 ± 2                                       | 77 ± 6                                       |
| PFDoDA     | 108 ± 2          | 114 ± 5                                       | 72 ± 9                                       |
| PFTrDA     | 112 ± 4          | 113 ± 7                                       | 84 ± 31                                      |
| PFTeDA     | 110 ± 9          | 109 ± 4                                       | 81 ± 26                                      |
| PFBS       | 106 ± 6          | 118 ± 4                                       | 51 ± 5                                       |
| PFHxS      | 108 ± 3          | 105 ± 3                                       | 51 ± 11                                      |
| PFHpS      | 128 ± 3          | 138 ± 4                                       | 76 ± 5                                       |
| L-PFOS     | 105 ± 10         | 109 ± 4                                       | 76 ± 1                                       |
| PFDS       | 89 ± 3           | 102 ± 11                                      | 67 ± 7                                       |
| 4:2 FTSA   | 107 ± 16         | 107 ± 3                                       | 62 ± 8                                       |
| 6:2 FTSA   | 113 ± 9          | 119 ± 3                                       | 73 ± 9                                       |
| 8:2 FTSA   | 81 ± 7           | 99 ± 10                                       | 68 ± 3                                       |
| 10:2 FTSA  | 52 ± 8           | 79 ± 4                                        | 55 ± 5                                       |
| FOSA       | 111 ± 9          | 109 ± 1                                       | 68 ± 6                                       |
| MeFOSA     | NA               | 108 ± 2                                       | 50 ± 13                                      |
| EtFOSA     | NA               | 101 ± 2                                       | 47 ± 16                                      |
| FOSAA      | 102 ± 11         | 104 ± 8                                       | 84 ± 5                                       |
| MeFOSAA    | 104 ± 4          | 100 ± 4                                       | 81 ± 6                                       |
| EtFOSAA    | 123 ± 9          | 111 ± 5                                       | 66 ± 14                                      |
| 6:2 diPAP  | 109 ± 1          | 118 ± 13                                      | 55 ± 21                                      |
| 8:2 diPAP  | 139 ± 39         | 132 ± 9                                       | 55 ± 7                                       |
| HFPO-DA    | 97 ± 1           | 112 ± 2                                       | NM                                           |
| ADONA      | 99 ± 2           | 114 ± 4                                       | NM                                           |

**Table S7: PFAS concentrations determined in NIST SRM 1947 reference material and in an in-house control matrix (common chub *S. Cephalus* from the Luynes River, France).** For the latter, two procedures were compared: the usual extraction method applied for direct PFAS analysis and the extraction method used for the TOP assay. \*: in the “usual” extraction procedure, ISs were added prior to the extraction step whereas in the procedure used for the TOP assay ISs were added after the oxidation step and prior to the Strata-XAW SPE cleanup step. †: oxidation was not performed on these extracts and amounts were determined for the calculation of recover only (see table S6). For the NIST SRM 1947 matrix, relative percent differences between concentrations measured in this work study and those found by Reiner et al. (2012) were calculated (only for compounds quantified in the two studies cases).

|            | NIST SRM 1947 Lake Michigan Trout |                                         |                                  | In-house control                                                    |                                                                            |
|------------|-----------------------------------|-----------------------------------------|----------------------------------|---------------------------------------------------------------------|----------------------------------------------------------------------------|
|            | This study                        | NIST Method 1<br>Reiner et al.,<br>2012 | Relative percent<br>differences* | Common Chub<br>from Luynes river<br>(usual extraction<br>procedure) | Common Chub<br>from Luynes river<br>(oxidation<br>extraction<br>procedure) |
| Replicates | 4                                 | 24                                      |                                  | 4                                                                   | 3                                                                          |
| PFBA       | <LOD                              | < 0.861                                 | NC                               | <LOD                                                                | <LOD                                                                       |
| PFPeA      | <LOD                              | < 0.441                                 | NC                               | <LOD                                                                | <LOD                                                                       |
| PFHxA      | 0.173 ± 0.070                     | < 0.917                                 | NC                               | <LOD                                                                | <LOD                                                                       |
| PFHpA      | 0.072 ± 0.007                     | < 0.069                                 | NC                               | <LOD                                                                | <LOD                                                                       |
| PFOA       | 0.105 ± 0.011                     | < 0.297                                 | NC                               | 0.42 ± 0.080                                                        | 0.721 ± 0.176                                                              |
| PFNA       | 0.259 ± 0.064                     | 0.179 ± 0.013                           | 45                               | 1.14 ± 0.27                                                         | 0.969 ± 0.200                                                              |
| PFDA       | 0.279 ± 0.016                     | 0.282 ± 0.062                           | -1.1                             | 25.5 ± 4.8                                                          | 27.1 ± 1.9                                                                 |
| PFUnDA     | 0.271 ± 0.014                     | 0.212 ± 0.024                           | 22                               | 15.7 ± 1.7                                                          | 15.4 ± 1.7                                                                 |
| PFDoDA     | 0.265 ± 0.017                     | < 0.137                                 | NC                               | 22.2 ± 3.4                                                          | 26.5 ± 3.6                                                                 |
| PFTTrDA    | 0.187 ± 0.015                     | 0.154 ± 0.020                           | 18                               | 8.4 ± 1.7                                                           | 11.5 ± 0.8                                                                 |
| PFTeDA     | 0.107 ± 0.015                     | 0.198 ± 0.069                           | -85                              | 8.4 ± 0.2                                                           | 8.85 ± 1.3                                                                 |
| PFBS       | <LOD                              | < 0.194                                 | NC                               | <LOD                                                                | <LOD                                                                       |
| PFHxS      | 0.058 ± 0.006                     | < 0.049                                 | NC                               | 0.534 ± 0.193                                                       | 0.46 ± 0.02                                                                |
| PFHpS      | 0.034 ± 0.013                     | NM                                      | NC                               | <LOD                                                                | <LOD                                                                       |
| L-PFOS     | 7.19 ± 0.556                      | 6.17 ± 0.60                             | 14                               | 106.0 ± 17.3                                                        | 102.0 ± 6.3                                                                |
| PFDS       | 0.202 ± 0.009                     | NM                                      | NC                               | 1.37 ± 0.18                                                         | 1.75 ± 0.26                                                                |
| 4:2 FTSA   | <LOD                              | NM                                      | NC                               | NM                                                                  | NM                                                                         |
| 6:2 FTSA   | <LOD                              | NM                                      | NC                               | NM                                                                  | NM                                                                         |
| 8:2 FTSA   | <LOD                              | NM                                      | NC                               | NM                                                                  | NM                                                                         |
| 10:2 FTSA  | <LOD                              | NM                                      | NC                               | NM                                                                  | NM                                                                         |
| FOSA       | 0.120 ± 0.010                     | < 0.151                                 | NC                               | NM                                                                  | NM                                                                         |
| N-MeFOSA   | <LOD                              | NM                                      | NC                               | NM                                                                  | NM                                                                         |
| N-EtFOSA   | <LOD                              | NM                                      | NC                               | NM                                                                  | NM                                                                         |
| FOSAA      | <LOD                              | NM                                      | NC                               | NM                                                                  | NM                                                                         |
| N-MeFOSAA  | 0.023 ± 0.007                     | NM                                      | NC                               | NM                                                                  | NM                                                                         |
| N-EtFOSAA  | 0.063 ± 0.012                     | NM                                      | NC                               | NM                                                                  | NM                                                                         |
| 6:2 diPAP  | <LOD                              | NM                                      | NC                               | NM                                                                  | NM                                                                         |
| 8:2 diPAP  | <LOD                              | NM                                      | NC                               | NM                                                                  | NM                                                                         |
| HFPO-DA    | <LOD                              | NM                                      | NC                               | NM                                                                  | NM                                                                         |
| ADONA      | <LOD                              | NM                                      | NC                               | NM                                                                  | NM                                                                         |

### SI 3. TOP assay

#### SI 3.1. Oxidation tests performed on spiked ultra-pure water samples

The TOP assay was initially validated with experiments performed using representative pre-PFAAs spiked into ultra-pure water at 50 ng L<sup>-1</sup>: 8:2 FTSA, 6:2 diPAP, FOSA and MeFOSAA. Experiments were performed individually, i.e. only one precursor was added in each water sample. We observed the complete oxidation of these precursors under the selected conditions. Precursor to PFCA conversion rates were determined as the ratio between the molar concentrations of produced PFCAs and the initial molar concentration of precursors. The oxidation of 8:2 FTSA and 6:2 diPAP produced series of C<sub>4</sub>–C<sub>9</sub> PFCA and C<sub>4</sub>–C<sub>7</sub> PFCA homologues, respectively, while that of FOSA and MeFOSAA produced mainly PFOA. Overall, the conversion rates were similar to those estimated by Houtz and Sedlak (2012) (Table S8).

Then, the efficiency of the TOP assay was assessed for each sample batch. Ultra-pure water samples were spiked with 4 selected precursors: 8:2 FTSA, 6:2 diPAP, FOSA and MeFOSAA at about 50 ng L<sup>-1</sup>. 100 mL of these spiked samples were transferred in separate 125mL-HDPE bottles. One replicate was stored at room temperature and one replicate was oxidized under after addition of persulfate (60 mM) and NaOH (150 mM) and incubation at 85°C for 6h. After IS addition, all replicates were subjected to the water extraction procedure. The complete oxidation of all precursors was systematically observed.

The same procedure was carried out on ultra-pure water samples spiked with the 16 analyzed PFAAs to determine their stability during the oxidation procedure. A significant decrease of C<sub>11</sub>–C<sub>14</sub> PFCAs and PFDS concentrations was observed upon oxidation (Figure S2). This loss of long-chain PFAAs was not attributed to their degradation because no concentration decrease of shorter-chain PFAAs was observed; rather, sorption onto the container and enrichment at the liquid/air interface may explain such a loss. A correction factor based on apparent recoveries was therefore applied to the concentration of these analytes in extracts subjected to oxidation.

**Table S8: Molar conversion rates (%) of selected precursors into PFCAs in ultra-pure water upon oxidation.**

|                      |                            | $\Delta[\text{PFBA}]/$<br>[precursors] <sub>0</sub> | $\Delta[\text{PFPeA}]/$<br>[precursors] <sub>0</sub> | $\Delta[\text{PFHxA}]/$<br>[precursors] <sub>0</sub> | $\Delta[\text{PFHpA}]/$<br>[precursors] <sub>0</sub> | $\Delta[\text{PFOA}]/$<br>[precursors] <sub>0</sub> | $\Delta[\text{PFNA}]/$<br>[precursors] <sub>0</sub> | $\Delta[\text{PFOS}]/$<br>[precursors] <sub>0</sub> |
|----------------------|----------------------------|-----------------------------------------------------|------------------------------------------------------|------------------------------------------------------|------------------------------------------------------|-----------------------------------------------------|-----------------------------------------------------|-----------------------------------------------------|
| 8:2 FTSA<br>(n = 6)  | this study                 | 9 ± 4                                               | 13 ± 3                                               | 22 ± 4                                               | 32 ± 8                                               | 33 ± 6                                              | 3 ± 0.5                                             |                                                     |
|                      | Houtz and Sedlak<br>(2012) | 11 ± 4                                              | 12 ± 4                                               | 19 ± 3                                               | 27 ± 3                                               | 21 ± 2                                              | 3 ± 0.1                                             |                                                     |
| 6:2 diPAP<br>(n = 6) | this study                 | 24 ± 6                                              | 61 ± 7                                               | 51 ± 7                                               | 21 ± 4                                               |                                                     |                                                     |                                                     |
|                      | Houtz and Sedlak<br>(2012) | 27 ± 3                                              | 47 ± 3                                               | 47 ± 3                                               | 15 ± 3                                               |                                                     |                                                     |                                                     |
| FOSA<br>(n = 6)      | this study                 |                                                     |                                                      | 0.4 ± 0.5                                            | 1.1 ± 0.4                                            | 128 ± 16                                            |                                                     | 1.5 ± 0.3                                           |
|                      | Houtz and Sedlak<br>(2012) |                                                     |                                                      |                                                      |                                                      | 97 ± 3                                              |                                                     |                                                     |
| MeFOSAA<br>(n = 6)   | this study                 |                                                     | 0.6 ± 0.6                                            | 1.8 ± 0.2                                            | 4.1 ± 1.0                                            | 121 ± 24                                            |                                                     | 1.0 ± 0.3                                           |
|                      | Houtz and Sedlak<br>(2012) |                                                     |                                                      |                                                      |                                                      | 110 ± 8                                             |                                                     |                                                     |

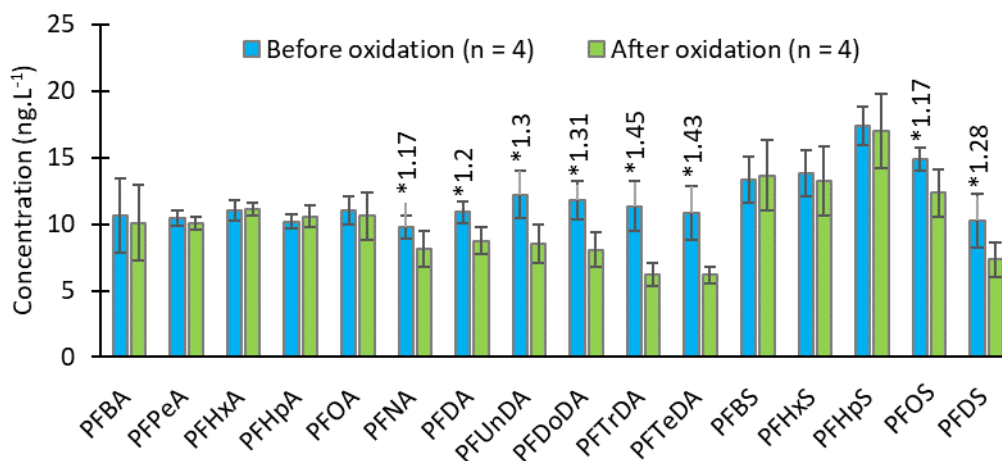

**Figure S2: PFCA and PFSA concentrations in ultra-pure water before and after oxidation. The indicated numbers correspond to the correction factors applied to the concentrations after oxidation to compensate the losses observed during the TOP assay procedure.**

### SI 3.2. Oxidation tests performed on fish tissue extracts

A preliminary test was carried out on a sample of fish tissues (common chub *S. cephalius* from the Luynes River, SE France). The presence of PFAAs and some of their precursors (e.g. 8:2 FTSA) in this sample had been previously characterized. Samples consisting of 600 mg (dry weight) of ground tissues were extracted by microwave assisted extraction with MeOH + 0.2% NH<sub>4</sub>OH, and the so-obtained extracts were cleaned-up with ENVI-carb cartridges and evaporated under a nitrogen stream to 300 µL. Then, 50 µL-aliquots were transferred into 6 HDPE 125mL-bottles and evaporated to dryness at room temperature under a nitrogen stream. Ultra-pure water (100 mL) was added to 3 bottles while 100 mL of ultra-pure water containing 60 mM of persulfate and 150 mM of NaOH were added to the other three bottles, which were placed in an oven at 85°C during 6h. After cooling and pH neutralization with HCl (1M), ISs were added to the six bottles (i.e. ISs were not added at the beginning of the sample preparation but after the TOP assay to avoid their own oxidation). Then, all samples were extracted on X-AW cartridges, evaporated to 300 µL and analyzed by LC-MS/MS. Note that persulfate and NaOH amounts were 16 times higher than in the method developed by Houtz et al. (2013) for soil samples, so as to maximize the conversion rates of pre-PFAAs in such complex biota extracts.

The results showed the complete conversion of targeted precursors (Figure S3) and a large increase of C<sub>4</sub>-C<sub>9</sub> PFCA levels. Variation coefficients < 8 % highlighted the good repeatability of the assay.

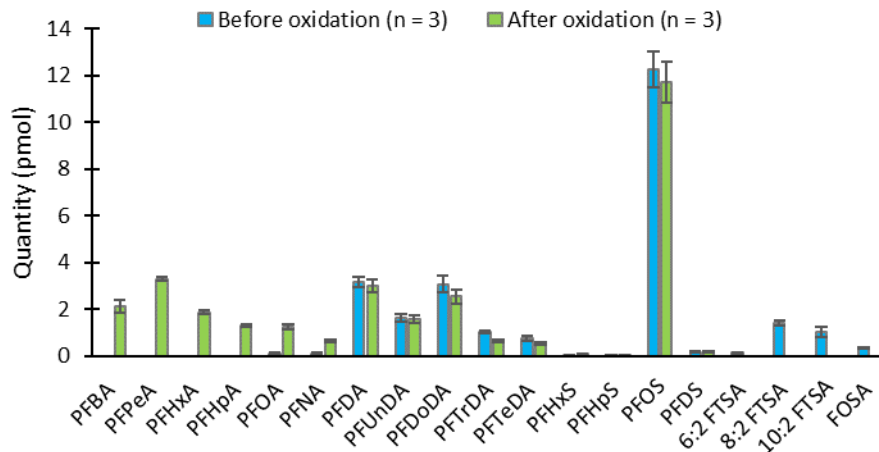

**Figure S3: PFAS quantities in tissues of *S. cephalus* before and after oxidation (n = number of replicates, error bars indicate the standard deviation)**

### SI 3.3 Estimation of the contribution of $\sum$ pre-PFAAs<sub>unknown</sub> to $\sum$ PFASs

To estimate the contribution of  $\sum$ pre-PFAAs<sub>unknown</sub> to  $\sum$ PFASs, concentrations of PFCAs, PFSAs and pre-PFAAs<sub>targeted</sub> were first expressed on a molar basis ( $C_M$ ).  $C_M(\sum$ pre-PFAAs<sub>targeted</sub>) were then converted to  $C_M$ (PFCAs) using previously determined conversion factors (Table S15) and this concentration was subtracted from  $\Delta$ PFCAs to estimate the  $C_M$ (PFCAs) resulting from the oxidation of unknown precursors. Finally, to estimate  $C_M\sum$ pre-PFAAs<sub>unknown</sub> on a molar basis, we assumed that one mole of each precursor produced one mole of PFCAs of similar chain length upon oxidation because i) the proportions of unidentified precursors with one, two (e.g. di-PAPs) or three perfluoroalkyl chains (such as tri-PAPs) were unknown, and ii) the molar yields of PFCAs from unidentified precursors were undetermined. In this way,  $C_M(\sum$ pre-PFAAs<sub>unknown</sub>) is given as a maximum estimate of the molar concentration of extracted and oxidized unidentified pre-PFAAs. Finally, it should be noted that since C<sub>2</sub>–C<sub>3</sub> PFCAS were not analyzed,  $C_M(\sum$ pre-PFAAs<sub>unknown</sub>) may have been underestimated. However, the extent of such underestimation depends on the pre-PFAAs<sub>unknown</sub> pattern (Janda et al., 2019) that, by definition, remains undetermined at this stage.

#### SI 4. Supplementary results

**Table S9: Concentration of PFASs detected in sediments (ng g<sup>-1</sup> dry weight) and water (ng L<sup>-1</sup>) samples.**

|           | <b>Sediments (n = 3)</b><br><b>Mean ± SD</b> | <b>Water (n = 1)</b> |
|-----------|----------------------------------------------|----------------------|
| PFBA      | <0.22                                        | 6.88                 |
| PFPeA     | <0.35                                        | 12.0                 |
| PFHxA     | 0.03 ± 0.05                                  | 13.9                 |
| PFHpA     | <0.05                                        | 4.85                 |
| PFOA      | 0.04 ± 0.07                                  | 8.74                 |
| PFNA      | <0.10                                        | 1.07                 |
| PFDA      | 0.13 ± 0.22                                  | 3.41                 |
| PFUnDA    | 0.05 ± 0.09                                  | <0.17                |
| PFDoDA    | 0.72 ± 0.61                                  | <0.27                |
| PFTTrDA   | 0.10 ± 0.17                                  | <0.29                |
| PFTeDA    | 0.47 ± 0.35                                  | <0.23                |
| PFBS      | <0.09                                        | 3.27                 |
| PFHxS     | <0.08                                        | 9.51                 |
| PFHpS     | <0.08                                        | 0.66                 |
| ∑PFOS     | 0.53 ± 0.52                                  | 28.8                 |
| L-PFOS    | 0.47 ± 0.42                                  | 15.5                 |
| Br-PFOS   | 0.08 ± 0.07                                  | 13.3                 |
| 6:2 FTSA  | <0.01                                        | 8.03                 |
| 8:2 FTSA  | <0.05                                        | <0.003               |
| 10:2 FTSA | 0.13 ± 0.10                                  | <0.11                |
| FOSA      | <0.08                                        | 0.21                 |
| FOSAA     | <0.03                                        | <0.10                |
| MeFOSAA   | <0.05                                        | <0.05                |
| EtFOSAA   | 0.02 ± 0.03                                  | <0.18                |
| 6:2 diPAP | 0.11 ± 0.08                                  | <0.34                |
| ∑PFASs    | 2.28 ± 2.31                                  | 101.4                |

**Table S10: Concentrations of PFASs detected in fish, expressed in ng g<sup>-1</sup> ww (mean ± standard deviation, n = number of samples). Analytes never detected are not shown.**

| Species   | Detection frequency % | <i>B. barbus</i> | <i>C. gobio</i>   | <i>R. rutilus</i> | <i>G. gobio</i> | <i>P. fluviatilis</i> | <i>L. gibbosus</i> | <i>I. melas</i> | <i>T. tinca</i> |
|-----------|-----------------------|------------------|-------------------|-------------------|-----------------|-----------------------|--------------------|-----------------|-----------------|
|           |                       | Barbel           | European bullhead | Common roach      | Gudgeon         | Common perch          | Sunfish            | Catfish         | Tench           |
| n         |                       | 1                | 4                 | 4                 | 4               | 4                     | 4                  | 4               | 4               |
| PFPeA     | 0                     | <0.10            | <0.01             | <0.01             | <0.01           | <0.01                 | <0.01              | <0.01           | <0.01           |
| PFHxA     | 21                    | <0.02            | 0.07 ± 0.03       | 0.02 ± 0.04       | <0.02           | 0.01 ± 0.01           | <0.02              | <0.02           | <0.02           |
| PFHpA     | 17                    | <0.01            | 0.06 ± 0.03       | <0.01             | <0.01           | <0.01                 | <0.01              | <0.01           | <0.01           |
| PFOA      | 90                    | 0.09             | 0.65 ± 0.17       | 0.05 ± 0.03       | 0.10 ± 0.01     | 0.07 ± 0.03           | 0.05 ± 0.03        | 0.04 ± 0.05     | 0.11 ± 0.02     |
| PFNA      | 100                   | 0.53             | 0.76 ± 0.15       | 0.21 ± 0.03       | 0.28 ± 0.06     | 0.23 ± 0.07           | 0.20 ± 0.05        | 0.22 ± 0.06     | 0.44 ± 0.10     |
| PFDA      | 90                    | 9.56             | 5.63 ± 1.96       | 5.19 ± 1.02       | 4.13 ± 2.85     | 7.32 ± 0.91           | 3.68 ± 2.56        | 2.60 ± 0.56     | 2.78 ± 1.94     |
| PFUnDA    | 100                   | 5.71             | 4.26 ± 1.32       | 3.88 ± 0.53       | 3.45 ± 0.52     | 4.42 ± 0.71           | 3.24 ± 1.01        | 2.28 ± 0.56     | 2.01 ± 0.39     |
| PFDoDA    | 100                   | 26.50            | 42.2 ± 13.1       | 28.7 ± 5.00       | 24.5 ± 4.89     | 32.5 ± 6.49           | 20.2 ± 8.03        | 19.8 ± 2.65     | 15.0 ± 4.44     |
| PFTTrDA   | 100                   | 3.84             | 10.4 ± 2.92       | 6.48 ± 1.41       | 4.54 ± 1.29     | 6.47 ± 1.40           | 4.57 ± 2.08        | 4.22 ± 0.25     | 2.74 ± 1.57     |
| PFTeDA    | 100                   | 6.18             | 25.3 ± 4.81       | 16.9 ± 2.94       | 13.8 ± 4.13     | 16.7 ± 3.91           | 11.5 ± 4.71        | 12.7 ± 1.39     | 6.95 ± 3.87     |
| PFHxS     | 93                    | 0.13             | 1.32 ± 0.40       | 0.12 ± 0.05       | 0.49 ± 0.58     | 0.12 ± 0.03           | 0.08 ± 0.06        | 0.08 ± 0.06     | 0.59 ± 0.20     |
| PFHpS     | 90                    | 0.06             | 0.28 ± 0.17       | 0.03 ± 0.04       | 0.05 ± 0.01     | 0.12 ± 0.03           | 0.05 ± 0.03        | 0.03 ± 0.01     | 0.12 ± 0.05     |
| ΣPFOS     | 100                   | 45.8             | 52.7 ± 23.0       | 43.4 ± 6.21       | 24.1 ± 7.02     | 55.7 ± 4.41           | 41.5 ± 12.2        | 15.8 ± 2.59     | 25.3 ± 10.9     |
| L-PFOS    | 100                   | 40.3             | 44.5 ± 19.0       | 39.9 ± 5.51       | 21.6 ± 6.29     | 49.6 ± 4.05           | 37.6 ± 10.7        | 14.8 ± 2.42     | 22.0 ± 9.59     |
| Br-PFOS   | 100                   | 5.45             | 8.19 ± 4.00       | 3.42 ± 0.71       | 2.44 ± 0.84     | 6.04 ± 0.61           | 3.89 ± 1.78        | 0.95 ± 0.25     | 3.31 ± 1.36     |
| PFDS      | 100                   | 2.10             | 0.99 ± 0.43       | 1.17 ± 0.23       | 0.92 ± 0.43     | 1.20 ± 0.21           | 1.02 ± 0.23        | 0.67 ± 0.15     | 0.60 ± 0.22     |
| 6:2 FTSA  | 72                    | 0.15             | 0.11 ± 0.04       | 0.03 ± 0.04       | 0.14 ± 0.04     | 0.14 ± 0.02           | 0.13 ± 0.01        | 0.01 ± 0.03     | 0.02 ± 0.04     |
| 8:2 FTSA  | 100                   | 0.98             | 0.22 ± 0.09       | 0.26 ± 0.08       | 0.47 ± 0.33     | 0.58 ± 0.13           | 0.21 ± 0.06        | 0.09 ± 0.02     | 0.68 ± 0.28     |
| 10:2 FTSA | 100                   | 3.23             | 1.59 ± 0.23       | 2.27 ± 0.36       | 2.54 ± 0.40     | 2.68 ± 0.40           | 1.41 ± 0.48        | 1.62 ± 0.18     | 1.71 ± 0.47     |
| FOSA      | 100                   | 0.69             | 0.76 ± 0.23       | 0.60 ± 0.14       | 0.57 ± 0.20     | 0.44 ± 0.09           | 0.23 ± 0.03        | 0.34 ± 0.04     | 0.35 ± 0.15     |
| FOSAA     | 31                    | 0.01             | <0.01             | 0.01 ± 0.01       | 0.01 ± 0.01     | <0.01                 | <0.01              | <0.01           | <0.01           |
| MeFOSAA   | 90                    | 0.02             | 0.03 ± 0.01       | 0.01 ± 0.01       | 0.05 ± 0.04     | 0.09 ± 0.02           | 0.04 ± 0.004       | 0.01 ± 0.01     | 0.02 ± 0.01     |
| EtFOSAA   | 93                    | 0.04             | 0.06 ± 0.03       | 0.04 ± 0.02       | 0.07 ± 0.04     | 0.14 ± 0.01           | 0.04 ± 0.02        | 0.01 ± 0.01     | 0.05 ± 0.02     |
| 6:2 diPAP | 59                    | 0.08             | 0.03 ± 0.03       | 0.04 ± 0.03       | 0.08 ± 0.02     | 0.08 ± 0.01           | 0.02 ± 0.03        | <0.03           | 0.02 ± 0.03     |
| ΣPFASs    |                       | 106              | 147 ± 45.3        | 109 ± 15.8        | 80.3 ± 17.6     | 129 ± 17.0            | 88.3 ± 20.1        | 60.4 ± 1.63     | 59.6 ± 16.9     |



**Table S11: Concentrations of PFASs detected in invertebrates, biofilm, macrophyte and leaf litter (ng g<sup>-1</sup> ww): mean concentrations (± standard deviation) are given when n=3, and individual values are given when n <3 (nd: not detected).**

| Species<br>n | Detection<br>frequency % | <i>Lymnaeidae</i><br>3 | <i>Corbiculidae</i><br>1 | <i>Gammaridae</i><br>3 | <i>Notonectidae</i><br>1 | Biofilm<br>2 | Macrophyte<br>2 | Leaf litter<br>2 |
|--------------|--------------------------|------------------------|--------------------------|------------------------|--------------------------|--------------|-----------------|------------------|
| PFPeA        | 21                       | <0.10                  | <0.10                    | 0.39 ± 0.34            | <0.10                    | <0.10        | <0.10           | <0.10, 0.15      |
| PFHxA        | 86                       | 0.04 ± 0.04            | <0.02                    | 0.47 ± 0.09            | 0.09                     | 0.04, 0.04   | 0.03, 0.03      | 0.06, 0.03       |
| PFHpA        | 50                       | <0.01                  | <0.01                    | 0.10 ± 0.18            | 0.28                     | 0.02, 0.02   | 0.02, 0.02      | 0.01, <0.01      |
| PFOA         | 100                      | 0.09 ± 0.08            | 0.04                     | 1.88 ± 0.04            | 3.19                     | 0.14, 0.12   | 0.10, 0.11      | 0.06, 0.06       |
| PFNA         | 86                       | 0.12 ± 0.14            | 0.06                     | 0.85 ± 0.09            | 1.62                     | 0.09, 0.05   | 0.11, 0.12      | <0.05, 0.05      |
| PFDA         | 93                       | 0.68 ± 0.68            | <0.03                    | 3.17 ± 0.24            | 5.79                     | 0.20, 0.10   | 0.48, 0.59      | 0.17, 0.29       |
| PFUnDA       | 100                      | 0.82 ± 0.50            | 0.02                     | 2.27 ± 0.14            | 2.91                     | 0.08, 0.06   | 0.30, 0.32      | 0.09, 0.12       |
| PFDoDA       | 100                      | 8.53 ± 5.36            | 0.70                     | 17.26 ± 0.98           | 19.56                    | 0.75, 0.77   | 1.43, 1.37      | 0.55, 0.62       |
| PFTTrDA      | 100                      | 0.87 ± 0.37            | 0.39                     | 2.10 ± 0.25            | 2.89                     | 0.16, 0.13   | 0.13, 0.13      | 0.07, 0.09       |
| PFTeDA       | 100                      | 4.66 ± 2.14            | 1.98                     | 8.11 ± 1.15            | 3.62                     | 0.46, 0.42   | 0.19, 0.23      | 0.15, 0.26       |
| PFHxS        | 50                       | <0.05                  | <0.05                    | 0.61 ± 0.05            | 4.47                     | <0.05, 0.06  | <0.05           | 0.06, 0.10       |
| PFHpS        | 29                       | <0.02                  | <0.02                    | 0.07 ± 0.01            | 0.22                     | <0.02        | <0.02           | <0.02            |
| ΣPFOS        | 100                      | 1.69 ± 0.50            | 0.12                     | 6.59 ± 0.24            | 32.29                    | 0.79, 0.62   | 1.58, 1.75      | 0.61, 1.01       |
| L-PFOS       | 100                      | 1.53 ± 0.16            | 0.12                     | 5.87 ± 0.24            | 27.6                     | 0.71, 0.56   | 1.39, 1.55      | 0.55, 0.88       |
| Br-PFOS      | 88                       | 0.48 ± 0.04            | <0.02                    | 0.72 ± 0.01            | 4.70                     | 0.07, 0.06   | 0.19, 0.21      | 0.06, 0.13       |
| PFDS         | 93                       | 0.15 ± 0.07            | 0.02                     | 0.10 ± 0.03            | 0.19                     | 0.02, 0.04   | 0.03, 0.04      | <0.005, 0.03     |
| 6:2 FTSA     | 86                       | 0.07 ± 0.07            | <0.05                    | 0.64 ± 0.06            | 5.24                     | 0.12, 0.14   | 0.08, 0.08      | 0.06, 0.06       |
| 8:2 FTSA     | 86                       | 0.08 ± 0.04            | <0.03                    | 0.50 ± 0.11            | 0.95                     | 0.03, 0.03   | 0.05, 0.06      | 0.03, <0.03      |
| 10:2 FTSA    | 100                      | 1.08 ± 0.60            | 0.50                     | 1.35 ± 0.42            | 0.30                     | 0.18, 0.20   | 0.22, 0.16      | 0.05, 0.10       |
| FOSA         | 86                       | 0.57 ± 0.16            | 0.21                     | 0.38 ± 0.01            | 0.58                     | 0.03, 0.01   | <0.01, 0.01     | <0.01, 0.01      |
| FOSAA        | 64                       | 0.03 ± 0.01            | <0.01                    | 0.06 ± 0.01            | 0.12                     | <0.01        | 0.01, 0.01      | <0.01            |
| MeFOSAA      | 50                       | 0.03 ± 0.01            | <0.01                    | 0.06 ± 0.004           | 0.09                     | <0.01        | <0.01           | <0.01            |
| EtFOSAA      | 50                       | 0.08 ± 0.04            | <0.01                    | 0.04 ± 0.003           | 0.16                     | <0.01        | <0.01           | <0.01            |
| 6:2 diPAP    | 50                       | 0.05 ± 0.05            | <0.03                    | 0.02 ± 0.04            | <0.03                    | 0.07, 0.10   | 0.03, 0.03      | <0.03            |
| ΣPFASs       |                          | 19.6 ± 8.97            | 4.03                     | 47.0 ± 2.5             | 84.6                     | 3.17, 2.92   | 4.81, 5.07      | 1.98, 2.98       |

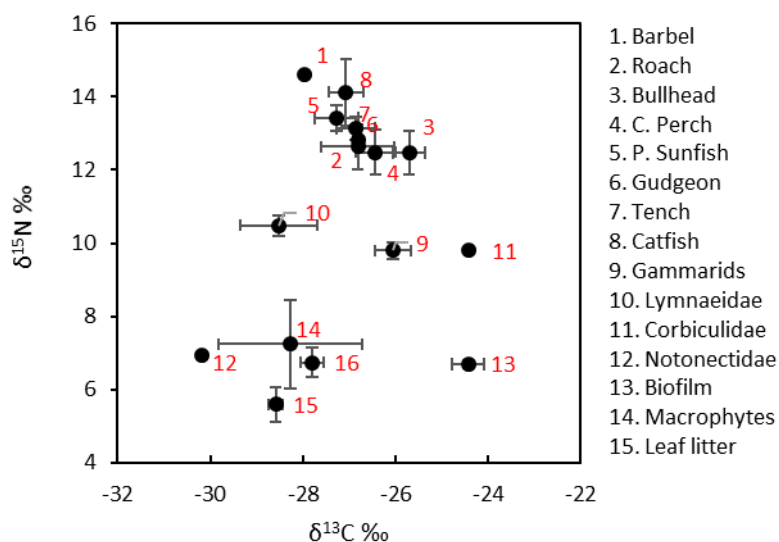

**Figure S4: Mean stable isotope signature ( $\delta^{15}\text{N}$  Vs  $\delta^{13}\text{C}$ ) of taxa collected from the Orge River (error bars correspond to standard deviations).**

TL ranges (or values when the number of samples was  $\leq 2$ ), calculated according to Post (2002), were as follows: barbel (3.4), roach (2.7-3.1), bullhead (2.6-3.0), C. perch (2.6-3.0), P. sunfish (3.0-3.2), gudgeon (2.8-3.0), tench (2.9-3.1), catfish (3.0-3.5), gammarids (1.9-2.1), lymnaeidae (2.1-2.3), corbiculidae (2.0), notonectidae (1.2), biofilm (1.1, 1.1), macrophytes (1.0, 1.5).

**Table S12: Biomagnification factors corrected for trophic level (mean  $\pm$  standard deviation). Concentrations were expressed in  $\text{ng g}^{-1}$  ww.  $\text{BMF}_{\text{TL}}$  was calculated only when the detection frequency of a given compound was 100 % in both the prey and the predator. NA: not available.**

|               | Roach/<br>Lymnaeidae | Roach/<br>Macrophyte | Gudgeon/<br>Gammarids | Gudgeon/<br>Lymnaeidae | Gudgeon/<br>Macrophyte | Tench/<br>Lymnaeida | Tench/<br>Macrophyte | Catfish/<br>Lymnaeidae | Catfish/<br>Gammarids |
|---------------|----------------------|----------------------|-----------------------|------------------------|------------------------|---------------------|----------------------|------------------------|-----------------------|
| PFOA          | NA                   | NA                   | $0.04 \pm 0.003$      | $1.2 \pm 0.1$          | $1.0 \pm 0.04$         | $1.4 \pm 0.3$       | $1.0 \pm 0.1$        | NA                     | NA                    |
| PFNA          | $2.3 \pm 0.6$        | $1.5 \pm 0.1$        | $0.3 \pm 0.1$         | NA                     | $1.7 \pm 0.2$          | NA                  | $2.2 \pm 0.3$        | NA                     | $0.3 \pm 0.1$         |
| PFDA          | $25.2 \pm 7.8$       | $4.2 \pm 0.5$        | NA                    | NA                     | NA                     | NA                  | NA                   | $3.5 \pm 0.7$          | $0.9 \pm 0.1$         |
| PFUnDA        | $11.6 \pm 2.5$       | $4.9 \pm 0.4$        | $1.6 \pm 0.3$         | $8.1 \pm 1.8$          | $4.3 \pm 0.4$          | $3.2 \pm 4.8$       | $2.9 \pm 0.3$        | $2.6 \pm 0.6$          | $1.0 \pm 0.2$         |
| PFDODA        | $6.9 \pm 1.8$        | $6.7 \pm 0.7$        | $1.5 \pm 0.3$         | $4.7 \pm 1.3$          | $5.7 \pm 0.7$          | $2.1 \pm 6.8$       | $3.9 \pm 0.7$        | $2.2 \pm 0.3$          | $1.1 \pm 0.1$         |
| PFTTrDA       | $24.1 \pm 8.1$       | $11.7 \pm 1.6$       | $2.4 \pm 0.8$         | $11.3 \pm 4.5$         | $8.7 \pm 1.5$          | $4.5 \pm 11.4$      | $5.7 \pm 1.8$        | $4.3 \pm 0.2$          | $1.7 \pm 0.1$         |
| PFTeDA        | $7.7 \pm 2.1$        | $15.8 \pm 1.7$       | $1.8 \pm 0.6$         | $5.0 \pm 2.1$          | $12.7 \pm 2.3$         | $1.7 \pm 15.3$      | $7.3 \pm 2.3$        | $2.5 \pm 0.3$          | $1.4 \pm 0.1$         |
| PFHxS         | NA                   | NA                   | $0.8 \pm 1.1$         | NA                     | NA                     | NA                  | NA                   | NA                     | NA                    |
| PFHpS         | NA                   | NA                   | $0.8 \pm 0.2$         | NA                     | NA                     | NA                  | NA                   | NA                     | NA                    |
| $\Sigma$ PFOS | $169.0 \pm 36.5$     | $7.7 \pm 0.7$        | $4.3 \pm 1.4$         | $48.9 \pm 19.8$        | $5.0 \pm 0.9$          | $33.2 \pm 7.0$      | $4.7 \pm 1.2$        | $8.0 \pm 1.2$          | $2.0 \pm 0.3$         |
| L-PFOS        | $172.8 \pm 36.0$     | $8.0 \pm 0.7$        | $4.4 \pm 1.4$         | $48.2 \pm 19.4$        | $5.1 \pm 4.6$          | $31.4 \pm 17.2$     | $4.7 \pm 1.2$        | $8.3 \pm 1.3$          | $2.1 \pm 0.3$         |
| Br-PFOS       | $133.9 \pm 41.4$     | $6.0 \pm 0.8$        | $4.0 \pm 1.5$         | $56.7 \pm 28.7$        | $0.9 \pm 0.9$          | $52.0 \pm 26.6$     | $5.0 \pm 1.2$        | $5.4 \pm 1.3$          | $1.2 \pm 0.3$         |
| PFDS          | $25.7 \pm 7.6$       | $8.9 \pm 1.1$        | $12.2 \pm 6.2$        | $14.8 \pm 9.0$         | $7.1 \pm 2.1$          | $6.0 \pm 8.8$       | $5.0 \pm 1.1$        | $4.0 \pm 0.8$          | $4.4 \pm 0.8$         |
| 6:2 FTSA      | NA                   | NA                   | $0.2 \pm 0.1$         | $2.5 \pm 0.9$          | NA                     | NA                  | NA                   | NA                     | NA                    |
| 8:2 FTSA      | $7.3 \pm 3.5$        | $2.6 \pm 0.5$        | $0.9 \pm 0.7$         | $15.7 \pm 16.3$        | $3.5 \pm 1.4$          | $17.2 \pm 2.1$      | $4.2 \pm 0.9$        | $1.2 \pm 0.3$          | $0.3 \pm 0.1$         |
| 10:2 FTSA     | $3.3 \pm 0.8$        | $4.7 \pm 0.5$        | $2.0 \pm 0.4$         | $3.5 \pm 0.8$          | $4.8 \pm 0.5$          | $1.8 \pm 4.7$       | $3.5 \pm 0.5$        | $1.5 \pm 0.2$          | $1.1 \pm 0.1$         |
| FOSA          | $1.1 \pm 0.4$        | NA                   | $1.6 \pm 0.6$         | $1.0 \pm 0.5$          | NA                     | NA                  | NA                   | $0.6 \pm 0.1$          | $0.9 \pm 0.1$         |
| FOSAA         | NA                   | NA                   | NA                    | NA                     | NA                     | NA                  | NA                   | NA                     | NA                    |
| MeFOSAA       | NA                   | NA                   | $0.8 \pm 0.8$         | $2.5 \pm 3.1$          | NA                     | NA                  | NA                   | NA                     | NA                    |
| EtFOSAA       | $0.4 \pm 0.3$        | NA                   | $2.2 \pm 1.3$         | $0.9 \pm 0.7$          | NA                     | NA                  | NA                   | NA                     | NA                    |
| 6:2 diPAP     | NA                   | NA                   | NA                    | NA                     | $1.7 \pm 0.3$          | NA                  | NA                   | NA                     | NA                    |

**Table S13: TMF calculations: details on regressions of Log C (concentrations expressed in ng g<sup>-1</sup> ww, whole body) vs TL obtained with the *lme* function of the NADA R-package.**

|           | <b>Slope<br/>(95% confidence interval)</b> | <b>Intercept<br/>(95% confidence interval)</b> |
|-----------|--------------------------------------------|------------------------------------------------|
| PFHxA     | -0.64 (-0.74 – -0.53)                      | -0.54 (-1.11 – 0.02)                           |
| PFOA      | -0.25 (-0.30 – -0.20)                      | -0.34 (-0.63 – -0.05)                          |
| PFNA      | 0.20 (0.17 – 0.22)                         | -1.12 (-1.28 – -0.97)                          |
| PFDA      | 0.41 (0.34 – 0.47)                         | -0.87 (-1.30 – -0.43)                          |
| PFUnDA    | 0.34 (0.32 – 0.36)                         | -0.74 (-0.88 – -0.59)                          |
| PFDoDA    | 0.38 (0.36 – 0.40)                         | 0.06 (-0.07 – 0.19)                            |
| PFTTrDA   | 0.46 (0.44 – 0.48)                         | -0.86 (-0.99 – -0.74)                          |
| PFTeDA    | 0.46 (0.44 – 0.48)                         | -0.43 (-0.56 – -0.30)                          |
| PFHxS     | 0.07 (-0.01 – 0.15)                        | -1.11 (-1.64 – -0.58)                          |
| PFHpS     | 0.19 (0.14 – 0.24)                         | -1.97 (-2.31 – -1.62)                          |
| ∑PFOS     | 0.19 (0.16 – 0.21)                         | 0.53 (0.31 – 0.75)                             |
| L-PFOS    | 0.20 (0.17 – 0.23)                         | 0.41 (0.19 – 0.63)                             |
| Br-PFOS   | 0.27 (0.23 – 0.31)                         | -0.70 (-1.00 – -0.39)                          |
| PFDS      | 0.74 (0.72 – 0.76)                         | -2.33 (-2.43 – -2.23)                          |
| 6:2 FTSA  | -0.24 (-0.28 – -0.20)                      | -0.45 (-0.72 – -0.17)                          |
| 8:2 FTSA  | 0.10 (0.07 – 0.14)                         | -1.04 (-1.27 – -0.80)                          |
| 10:2 FTSA | 0.48 (0.47 – 0.48)                         | -1.15 (-1.19 – -1.11)                          |
| FOSA      | 0.40 (0.37 – 0.42)                         | -1.60 (-1.78 – -1.42)                          |
| FOSAA     | -0.19 (-0.29 – -0.09)                      | -1.90 (-2.53 – -1.28)                          |
| MeFOSAA   | 0.17 (0.13 – 0.21)                         | -2.17 (-2.44 – -1.90)                          |
| EtFOSAA   | 0.16 (0.11 – 0.22)                         | -2.02 (-2.37 – -1.68)                          |
| 6:2 diPAP | 0.07 (0.04 – 0.11)                         | -1.80 (-2.05 – -1.56)                          |

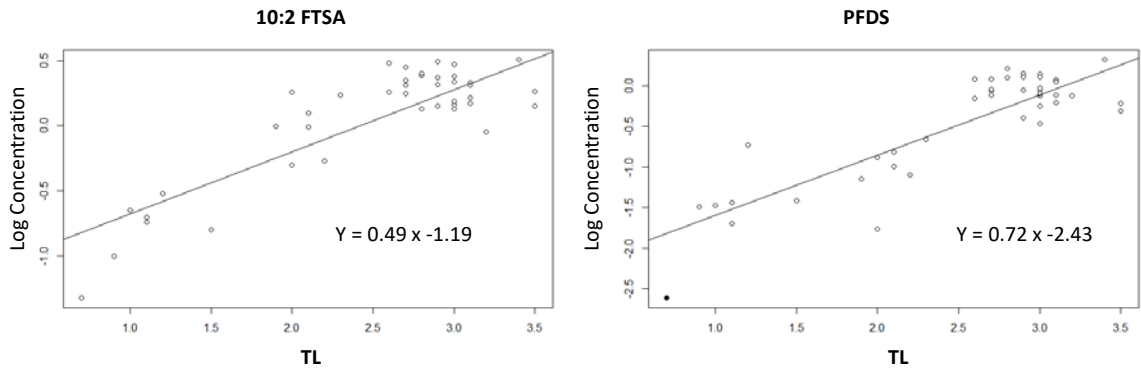

Figure S5: Linear regression of Log Concentration vs TL for 10:2 FTSA and PFDS, obtained using the Imec function.

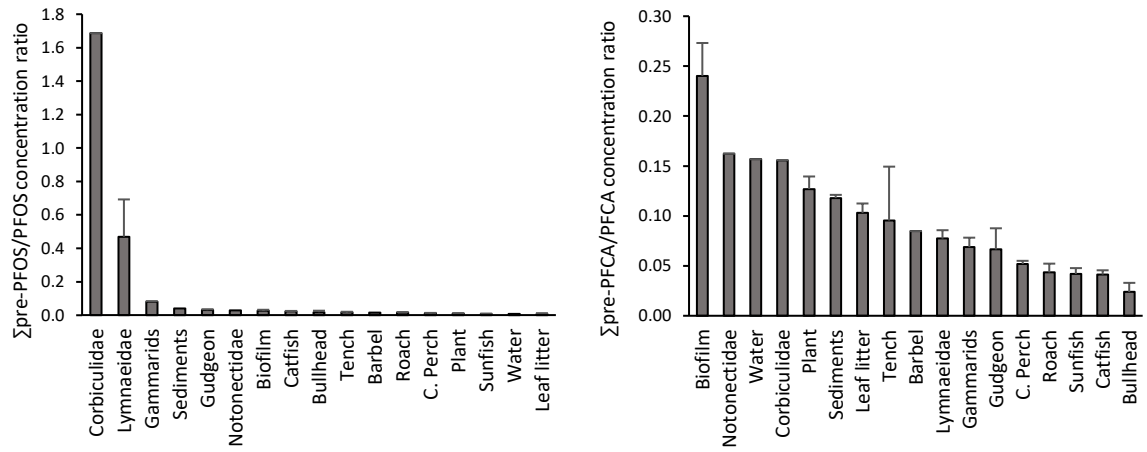

Figure S6:  $\Sigma$ pre-PFOS/PFOS and  $\Sigma$ pre-PFCAs/PFCA concentration ratios in the trophic web of the Orge river. Error bars indicate the standard deviation.

**Table S14: Increase of PFCA concentrations ( $\Delta$ PCFAs) after oxidation in  $\text{ng L}^{-1}$  for water,  $\text{ng g}^{-1}$  dw for sediments and  $\text{ng g}^{-1}$  ww for biota samples and in % according to the initial concentration for all matrices.**

| Sample       | $\Delta$ PFBA |    | $\Delta$ PFPA |     | $\Delta$ PFHxA |      | $\Delta$ PFHpA |      | $\Delta$ PFOA |      | $\Delta$ PFNA |      | $\Delta$ PFDA |     | $\Delta$ PFUnA |     | $\Delta$ PFDoA |     | $\Delta$ (PCFAs) |     |
|--------------|---------------|----|---------------|-----|----------------|------|----------------|------|---------------|------|---------------|------|---------------|-----|----------------|-----|----------------|-----|------------------|-----|
|              | C             | %  | C             | %   | C              | %    | C              | %    | C             | %    | C             | %    | C             | %   | C              | %   | C              | %   | C                | %   |
| water        | 2.0           | 29 | 24.4          | 202 | 8.4            | 60   | 3.0            | 62   | 0.1           | 1    | 0.9           | 86   | 0.0           | 0   | 0.0            | 0.0 | 0.0            | 0.0 | 39.7             | 78  |
| sediment     | 1.7           | NA | 1.5           | NA  | 1.1            | 1346 | 1.0            | NA   | 1.6           | 1323 | 1.1           | NA   | 0.9           | 246 | 0.7            | 439 | 0.6            | 44  | 10.7             | 319 |
| biofilm      | 1.1           | NA | 1.4           | NA  | 0.9            | 2310 | 0.9            | 4643 | 1.0           | 690  | 0.7           | 821  | 0.8           | 400 | 0.5            | 658 | 0.6            | 86  | 8.2              | 424 |
| macrophyte   | 0.8           | NA | 1.4           | NA  | 0.5            | 2071 | 0.5            | 2975 | 0.5           | 523  | 0.4           | 378  | 0.2           | 46  | 0.3            | 93  | 0.7            | 47  | 5.5              | 196 |
| leaf litter  | 0.6           | NA | 0.6           | NA  | 0.3            | 461  | 0.4            | 2524 | 0.4           | 702  | 0.4           | NA   | 0.3           | 154 | 0.3            | 306 | 0.2            | 32  | 3.5              | 298 |
| gammarids 1  | 1.4           | NA | 1.6           | NA  | 0.9            | 155  | 1.1            | 368  | 2.2           | 117  | 1.7           | 197  | 1.3           | 41  | 1.5            | 63  | 5.0            | 28  | 18.4             | 49  |
| gammarids 2  | 1.4           | NA | 1.2           | 239 | 0.9            | 216  | 1.3            | NA   | 1.3           | 69   | 1.1           | 149  | 1.4           | 46  | 1.4            | 58  | 3.1            | 17  | 14.8             | 39  |
| limnaeidae 1 | 1.3           | NA | 1.6           | NA  | 1.3            | 1862 | 1.5            | NA   | 1.9           | 1024 | 2.3           | 810  | 0.8           | 52  | 0.9            | 67  | 0.0            | 0   | 5.5              | 23  |
| limnaeidae 2 | 1.6           | NA | 1.6           | NA  | 1.3            | NA   | 1.7            | NA   | 2.2           | 3837 | 2.5           | 3423 | 1.3           | 383 | 1.5            | 279 | 0.6            | 11  | 11.6             | 82  |
| bullhead 1   | 1.4           | NA | 2.1           | NA  | 1.6            | 1648 | 1.6            | 2048 | 2.9           | 330  | 2.7           | 281  | 2.1           | 25  | 3.5            | 59  | 19.6           | 33  | 35.1             | 30  |
| bullhead 2   | 2.0           | NA | 1.6           | NA  | 1.4            | 3612 | 1.5            | 1671 | 2.8           | 497  | 2.9           | 443  | 2.5           | 59  | 1.6            | 57  | 8.4            | 31  | 26.2             | 43  |
| roach 1      | 1.7           | NA | 1.7           | NA  | 1.4            | 1833 | 1.6            | NA   | 3.1           | 4522 | 2.9           | 1291 | 3.0           | 56  | 2.7            | 70  | 9.7            | 32  | 33.5             | 52  |
| roach 2      | 1.5           | NA | 1.7           | NA  | 1.5            | NA   | 1.7            | NA   | 2.7           | 3615 | 2.8           | 1419 | 1.7           | 34  | 2.4            | 62  | 6.3            | 22  | 21.5             | 36  |
| c. perch 1   | 1.2           | NA | 1.9           | NA  | 1.5            | NA   | 1.3            | NA   | 2.4           | 2934 | 3.1           | 1246 | 1.6           | 20  | 2.4            | 50  | 4.8            | 16  | 18.6             | 29  |
| c. perch 2   | 2.0           | NA | 2.3           | NA  | 2.2            | NA   | 1.7            | NA   | 2.8           | 4474 | 3.1           | 1514 | 0.6           | 11  | 2.6            | 77  | 1.9            | 8   | 17.6             | 34  |
| catfish 1    | 1.3           | NA | 1.3           | NA  | 1.6            | NA   | 2.1            | NA   | 3.0           | 5048 | 2.4           | 1055 | 0.8           | 40  | 0.6            | 38  | 0.0            | 0   | 8.7              | 22  |
| catfish 2    | 0.9           | NA | 0.7           | NA  | 1.0            | NA   | 1.0            | NA   | 2.1           | NA   | 2.1           | 1372 | 1.2           | 57  | 1.8            | 86  | 0.1            | 1   | 6.0              | 15  |

**Table S15: Conversion factors used to estimate the molar concentration of PFCAs produced by the oxidation of known precursors.**

| PFCAs<br>Precursors | PFBA | PFPeA | PFHxA | PFHpA | PFOA | PFNA | PFDA | PFUnDA | Reference                                         |
|---------------------|------|-------|-------|-------|------|------|------|--------|---------------------------------------------------|
| 6:2 FTSA            | 0.22 | 0.27  | 0.22  | 0.02  |      |      |      |        | Houtz and Sedlak (2012)                           |
| 8:2 FTSA            | 0.09 | 0.13  | 0.22  | 0.32  | 0.33 | 0.03 |      |        | This study                                        |
| 10:2 FTSA           |      |       | 0.09  | 0.13  | 0.22 | 0.32 | 0.33 | 0.03   | Estimated based on results obtained for 8:2 FTSA  |
| FOSA                |      |       |       |       | 1.28 |      |      |        | This study                                        |
| FOSAA               |      |       |       |       | 1.2  |      |      |        | Estimated based on results obtained for N-MeFOSAA |
| MeFOSAA             |      |       |       |       | 1.2  |      |      |        | This study                                        |
| EtFOSAA             |      |       |       |       | 0.92 |      |      |        | Houtz and Sedlak (2012)                           |
| 6:2 diPAP           | 0.24 | 0.62  | 0.51  | 0.21  |      |      |      |        | This study                                        |

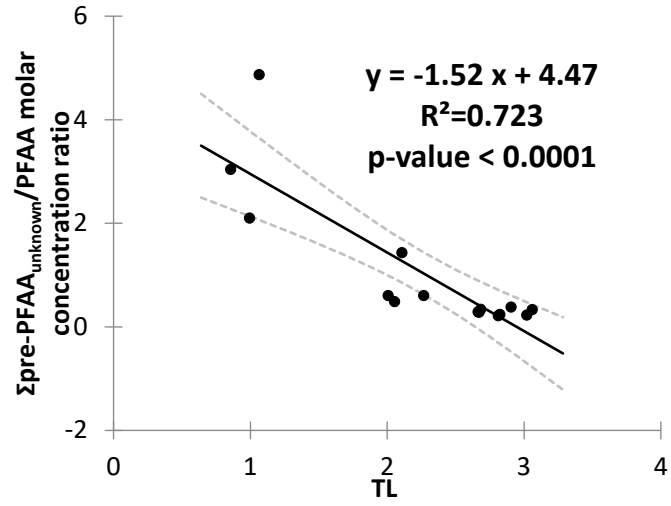

Figure S7: Relation between  $\Sigma\text{pre-PFAA}_{\text{unknown}}/\text{PFAA}$  molar concentration ratios and the trophic level (TL).

## References

- Janda, J.; Nödler, K.; Scheurer, M.; Happel, O.; Nürenberg, G.; Zwiener, C.; Lange, F. T. Closing the Gap – Inclusion of Ultrashort-Chain Perfluoroalkyl Carboxylic Acids in the Total Oxidizable Precursor (TOP) Assay Protocol. *Environ. Sci.: Processes Impacts* (2019) <https://doi.org/10.1039/C9EM00169G>
- Houtz, E.F., Sedlak, D.L., Oxidative conversion as a means of detecting precursors to perfluoroalkyl acids in urban runoff, *Environ. Sci. Technol.* 46 (2012) 9342–9349.
- Houtz, E.F., Higgins, C.P., Field, J.A., Sedlak, D.L. Persistence of perfluoroalkyl acid precursors in AFFF-impacted groundwater and soil, *Environ. Sci. Technol.* 47 (2013) 8187–8195.
- Martin, D. Munoz, G., Mejia-Avenidaño, S., Duy, S.V., Yao, Y., Volchek, K., Brown, C.E., Liu, J., Sauvé, S. Zwitterionic, cationic, and anionic perfluoroalkyl and polyfluoroalkyl substances integrated into Total Oxidizable Precursor Assay of contaminated groundwater, *Talanta*, 2019, 195, 533–542
- Munoz, G., Giraudel, J.-L., Botta, F., Lestremau, F., Dévier, M.-H., Budzinski, H., Labadie, P. Spatial distribution and partitioning behavior of selected poly- and perfluoroalkyl substances in freshwater ecosystems: A French nationwide survey, *Sci. Total Environ.* 517 (2015) 48–56
- Munoz, G., Desrosiers, M., Duy, S.V., Labadie, P., Budzinski, H., Liu, J., Sauvé, S. Environmental Occurrence of Perfluoroalkyl Acids and Novel Fluorotelomer Surfactants in the Freshwater Fish *Catostomus Commersonii* and Sediments Following Firefighting Foam Deployment at the Lac-Mégantic Railway Accident. *Environ. Sci. Technol.* (2017) 51 (3), 1231–1240
- Munoz, G., Ray, P., Mejia-Avenidaño, S., Sung, V.D., Dat, T.D. Liu, J., Sauvé, S. Optimization of Extraction Methods for Comprehensive Profiling of Perfluoroalkyl and Polyfluoroalkyl Substances in Firefighting Foam Impacted Soils. *Analytica Chimica Acta* 1034 (2018) 74–84
- Munoz, G., Ray P., Mejia-Avenidaño., Sung, V.D., D. Do, D.T., Liu, J., Sauvé, S. Optimization of Extraction Methods for Comprehensive Profiling of Perfluoroalkyl and Polyfluoroalkyl Substances in Firefighting Foam Impacted Soils. *Analytica Chimica Acta* (2018) 1034: 74–84
- Post, D. M. Using stable isotopes to estimate trophic position : models, methods, and assumptions, *Ecology* 83 (2002) 703–718
- Reiner, J.L., O’Connell, S.G., Butt, C.M., Mabury, S.A., Small, J.M., De Silva, A.O., Muir, D.C.G., Delinsky, A.D., Strynar, M.J., Lindstrom, A.B., Reagen, W.K., Malinsky, M., Schäfer, S., Kwadijk, C.J. F., Schantz, M.M., Keller, J.M. Determination of perfluorinated alkyl acid concentrations in biological standard reference materials, *Anal. Bioanal. Chem.* 404 (2012) 2683–2692
